# Supplementary material for: Rotating Night Shift Work and Bladder Cancer Risk in Women: Results of Two Prospective Cohort Studies
Source: Int J Environ Res Public Health. 2023 Jan 26;20(3):2202. doi: 10.3390/ijerph20032202 (PMC9915636; doi:10.3390/ijerph20032202)
Supplement: Supplementary file 1 [file ijerph-20-02202-s001.zip › Table S1.pdf]

**Table S1. Baseline characteristics of study participants according to the total duration of rotating night shift work in the NHS (baseline in 1988, n=82,147)**

| Characteristic                                            | Total Duration of Rotating Night Shiftwork |                            |                        |
|-----------------------------------------------------------|--------------------------------------------|----------------------------|------------------------|
|                                                           | Never<br>(N=33,142)                        | 1 to 5 Years<br>(N=33,417) | >5 Years<br>(N=15,588) |
| Age, years, mean (SD)                                     | 54.4 (7.2)                                 | 54.7 (7.1)                 | 56.1 (7.0)             |
| Caucasian, %                                              | 97.9                                       | 97.7                       | 97.0                   |
| BMI, kg/m <sup>2</sup> , mean (SD) <sup>a</sup>           | 25.3 (4.6)                                 | 25.4 (4.6)                 | 26.3 (5.2)             |
| Physical activity, MET-hours/week, mean (SD) <sup>b</sup> | 14.5 (20.6)                                | 15.9 (21.7)                | 16.3 (22.8)            |
| Pack-years of smoking, mean (SD) <sup>c</sup>             | 12.3 (18.3)                                | 12.5 (18.2)                | 14.5 (19.8)            |
| History of diabetes mellitus, %                           | 2.7                                        | 2.5                        | 4.4                    |
| Alcohol, g/day, mean (SD)                                 | 5.3 (9.7)                                  | 5.5 (9.8)                  | 4.7 (9.3)              |
| Multivitamin use, %                                       | 38.1                                       | 39.0                       | 38.9                   |
| Fruit and vegetables intake, g/day, mean (SD)             | 5.2 (2.4)                                  | 5.3 (2.5)                  | 5.4 (2.6)              |
| Total fluid intake, ml/day, mean (SD)                     | 2000 (629)                                 | 2027 (635)                 | 2079 (650)             |
| Total calorie intake, kcal/day, mean (SD)                 | 1739 (461)                                 | 1768 (466)                 | 1767 (479)             |
| Bacon intake, serving/week, mean (SD)                     | 0.6 (0.9)                                  | 0.6 (0.9)                  | 0.7 (1.0)              |
| Menopausal hormone use, %                                 | 37.6                                       | 38.5                       | 37.7                   |
| U.S. Geographic Region, %                                 |                                            |                            |                        |
| West                                                      | 13.7                                       | 12.3                       | 10.4                   |
| Midwest                                                   | 19.6                                       | 19.0                       | 19.1                   |
| South                                                     | 10.4                                       | 10.8                       | 10.9                   |
| Northeast                                                 | 56.3                                       | 57.9                       | 59.6                   |

Abbreviations: NHS, Nurses' Health Study; S.D., standard deviation; BMI, body mass index; MET, metabolic equivalent task.

<sup>a</sup> Calculated as weight in kilograms divided by height in meters squared.

<sup>b</sup> Weekly energy expenditure in MET-hours/week from recreational and leisure-time physical activity.

<sup>c</sup> Cumulative among ever smokers.
