# Supplementary material for: Rotating Night Shift Work and Bladder Cancer Risk in Women: Results of Two Prospective Cohort Studies
Source: Int J Environ Res Public Health. 2023 Jan 26;20(3):2202. doi: 10.3390/ijerph20032202 (PMC9915636; doi:10.3390/ijerph20032202)
Supplement: Supplementary file 1 [file ijerph-20-02202-s001.zip › Table S2.pdf]

**Table S2. Baseline characteristics of study participants according to the total duration of rotating night shift work in the NHS II (baseline in 1989, n=114,788)**

| Characteristic                                              | Total Duration of Rotating Night Shiftwork |                            |                        |
|-------------------------------------------------------------|--------------------------------------------|----------------------------|------------------------|
|                                                             | Never<br>(N=43,606)                        | 1 to 5 Years<br>(N=56,078) | >5 Years<br>(N=15,104) |
| Age, years, mean (SD)                                       | 34.4 (4.7)                                 | 34.1 (4.7)                 | 35.4 (4.0)             |
| Caucasian, %                                                | 96.4                                       | 95.2                       | 94.6                   |
| BMI, kg/m <sup>2</sup> , mean (SD) <sup>a</sup>             | 23.9 (4.9)                                 | 24.0 (5.0)                 | 25.0 (5.7)             |
| Physical activity, MET-hours/week, mean (S.D.) <sup>b</sup> | 22.7 (34.2)                                | 25.7 (37.5)                | 27.7 (40.4)            |
| Pack-years of smoking, mean (S.D.) <sup>c</sup>             | 3.7 (7.1)                                  | 3.9 (7.2)                  | 4.6 (7.8)              |
| History of diabetes mellitus, %                             | 0.0                                        | 0.0                        | 0.0                    |
| Alcohol, g/day, mean (SD)                                   | 2.6 (5.5)                                  | 2.8 (5.6)                  | 2.6 (5.3)              |
| Multivitamin use, %                                         | 45.0                                       | 45.6                       | 45.5                   |
| Fruit and vegetables intake, g/day, mean (SD)               | 4.0 (2.1)                                  | 4.1 (2.2)                  | 4.2 (2.3)              |
| Total fluid intake, ml/day, mean (SD)                       | 1816 (696)                                 | 1844 (704)                 | 1895 (735)             |
| Total calorie intake, kcal/day, mean (SD)                   | 1764 (492)                                 | 1787 (497)                 | 1794 (508)             |
| Bacon intake, serving/week, mean (S.D.)                     | 0.4 (0.6)                                  | 0.4 (0.7)                  | 0.4 (0.7)              |
| Menopausal hormone use, %                                   | 2.0                                        | 2.1                        | 2.4                    |
| U.S. Geographic Region, %                                   |                                            |                            |                        |
| West                                                        | 21.2                                       | 22.9                       | 23.0                   |
| Midwest                                                     | 36.9                                       | 37.1                       | 41.4                   |
| South                                                       | 16.7                                       | 16.1                       | 14.3                   |
| Northeast                                                   | 25.2                                       | 23.9                       | 21.2                   |

Abbreviations: NHS II, Nurses' Health Study II; S.D., standard deviation; BMI, body mass index; MET, metabolic equivalent task.

<sup>a</sup> Calculated as weight in kilograms divided by height in meters squared.

<sup>b</sup> Weekly energy expenditure in MET-hours/week from recreational and leisure-time physical activity.

<sup>c</sup> Cumulative among ever smokers.
